# Supplementary material for: A Mixture of Artemisia argyi and Saururus chinensis Improves PM2.5-Induced Cognitive Dysfunction by Regulating Oxidative Stress and Inflammatory Response in the Lung and Brain
Source: MDPI journal article supplement (doi:10.3390/plants12061230), 2023-03-08
Supplement: s1 [file s1]

**Table S1.** List of antibodies and their information used in this study

| Antibody                 | Catalog   | Conc.  | Manufacturer                                   |
|--------------------------|-----------|--------|------------------------------------------------|
| AChE                     | sc-373901 | 1:500  | Santa Cruz Biotech (Dallas, TX, United States) |
| Amyloid $\beta$          | sc-28365  | 1:500  | Santa Cruz Biotech (Dallas, TX, United States) |
| BAX                      | sc-7480   | 1:500  | Santa Cruz Biotech (Dallas, TX, United States) |
| $\beta$ -actin           | sc-69879  | 1:500  | Santa Cruz Biotech (Dallas, TX, United States) |
| Caspase-1                | sc-392736 | 1:500  | Santa Cruz Biotech (Dallas, TX, United States) |
| COX-2                    | sc-376861 | 1:500  | Santa Cruz Biotech (Dallas, TX, United States) |
| Cytochrome C             | sc-13560  | 1:500  | Santa Cruz Biotech (Dallas, TX, United States) |
| IL-1 $\beta$             | sc-4592   | 1:500  | Santa Cruz Biotech (Dallas, TX, United States) |
| p-JNK                    | sc-6254   | 1:500  | Santa Cruz Biotech (Dallas, TX, United States) |
| p-tau                    | sc-12952  | 1:500  | Santa Cruz Biotech (Dallas, TX, United States) |
| p-I $\kappa$ B- $\alpha$ | sc-8404   | 1:500  | Santa Cruz Biotech (Dallas, TX, United States) |
| p-NF- $\kappa$ B         | sc-8008   | 1:500  | Santa Cruz Biotech (Dallas, TX, United States) |
| TNF- $\alpha$            | sc-133192 | 1:500  | Santa Cruz Biotech (Dallas, TX, United States) |
| ChAT                     | 20747-1AP | 1:1000 | Bioneer (Daejeon, Korea)                       |

AChE, acetylcholinesterase; BAX, bcl-2-like protein 4; COX-2, cyclooxygenase-2; IL-1 $\beta$ , interleukin 1 beta; p-JNK, phosphorylated c-Jun N-terminal kinase; p-I $\kappa$ B, phosphorylated nuclear factor of kappa light polypeptide gene enhancer in B-cells inhibitor, alpha; p-NF- $\kappa$ B, phosphorylated nuclear factor kappa-light-chain-enhancer of activated B cells; TNF- $\alpha$ , tumor necrosis factor-alpha; ChAT, choline acetyltransferase

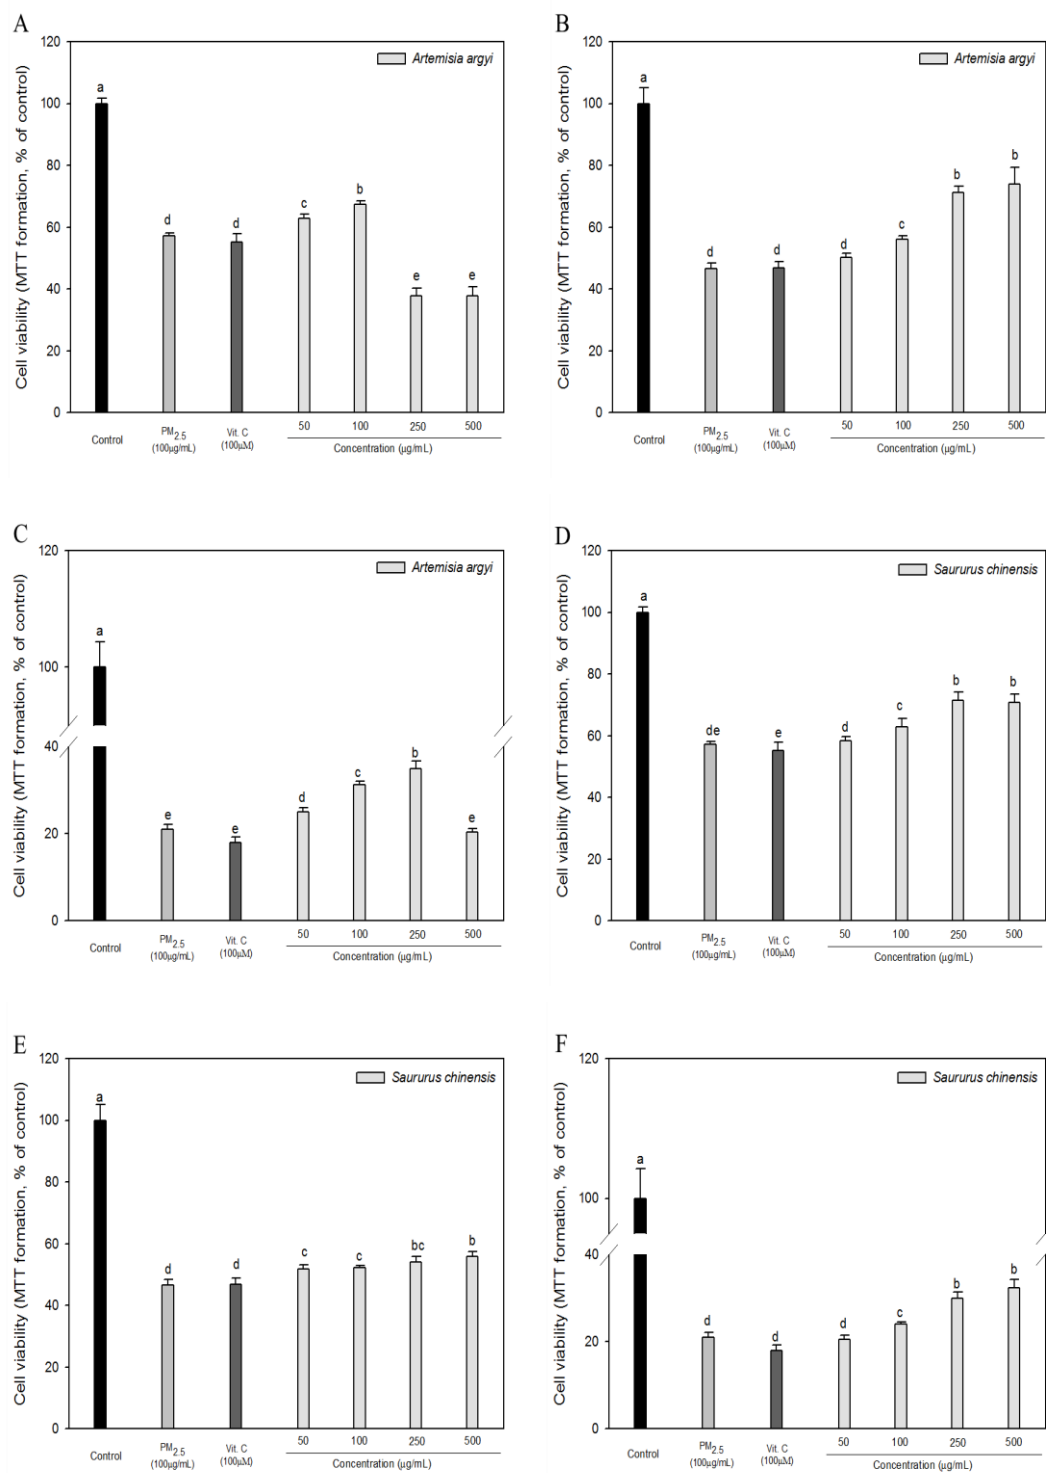

**Figure S1.** Effect of *Artemisia argyi* on PM<sub>2.5</sub>-induced cytotoxicity in (A) RPMI2650; nasal cell line (B) A549; alveolar basal epithelial cell line and (C) BV2 cell; microglial cell line and effect of *Saururus chinensis* on PM<sub>2.5</sub>-induced cytotoxicity in (D) RPMI2650, (E) A549, and (F) BV2 cell. Results are indicated as mean  $\pm$  SD (n = 3). Different small letters represent statistical difference ( $p < 0.05$ ) of each group in a high order.

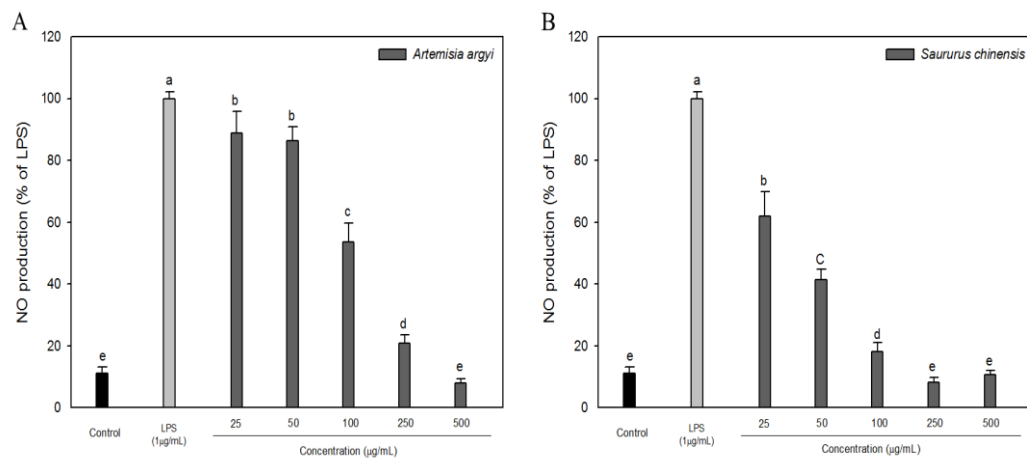

**Figure S2.** Effect of (A) *Artemisia argyi* and (B) *Saururus chinensis* on lipopolysaccharide (LPS)-induced nitroxide (NO) production in BV2; microglial cell line. Results are indicated as mean  $\pm$  SD (n = 3). Different small letters represent statistical difference ( $p < 0.05$ ) of each group in a high order.

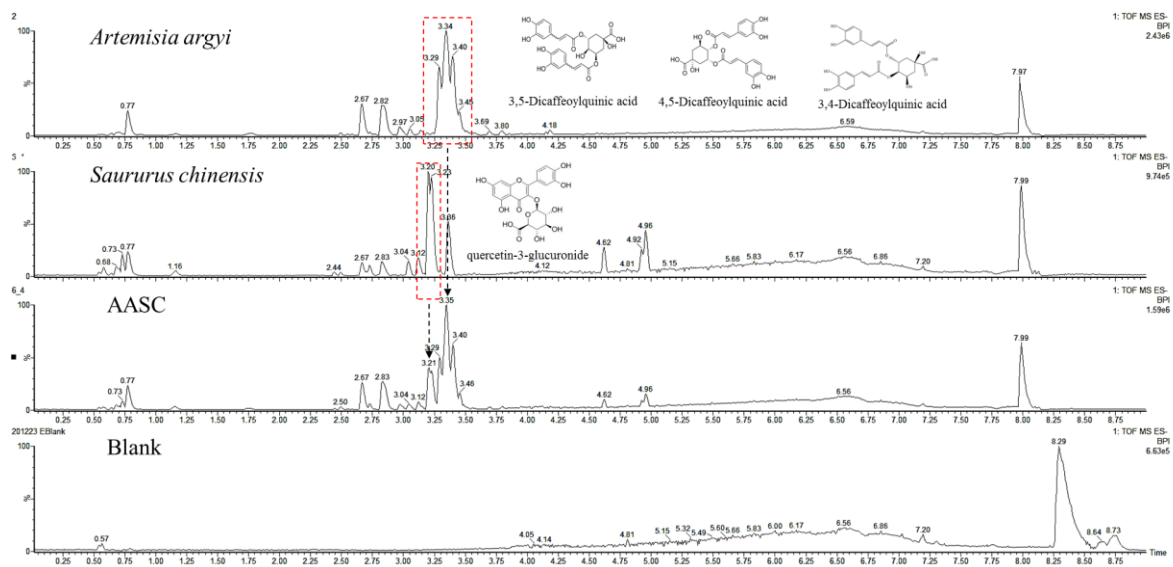

**Figure S3.** Analysis of *Artemisia argyi*, *Saururus chinensis*, AASC and Blank using UPLC/Q-TOF-MS/MS chromatography in negative ion mode.
